# Supplementary material for: Effects of calcium channel blockers comparing to angiotensin-converting enzyme inhibitors and angiotensin receptor blockers in patients with hypertension and chronic kidney disease stage 3 to 5 and dialysis: A systematic review and meta-analysis
Source: PubMed Central journal article supplement (PMC5730188; doi:10.1371/journal.pone.0188975), 2017-12-14
Supplement: pone.0188975.s003.pdf [file pone.0188975.s003.pdf]

Funnel Plot of Standard Error by Std diff in means

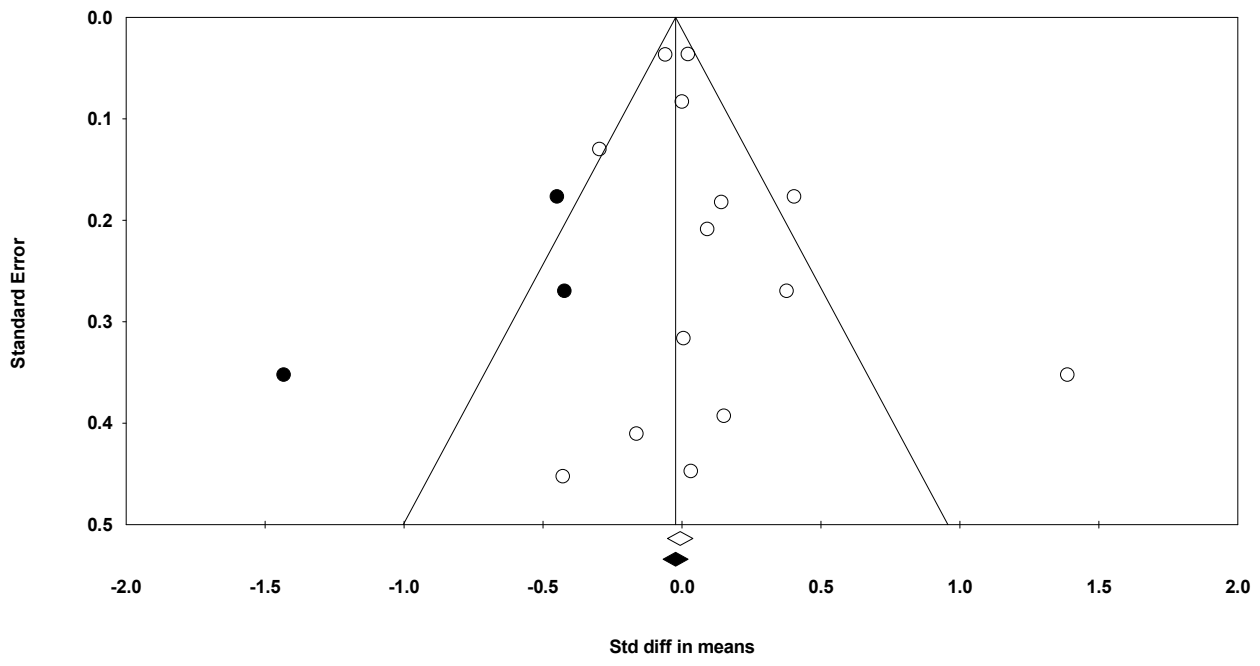

### **Begg and Mazumdar rank correlation**

**Kendall's S statistic (P-Q)** -9.00000

### **Kendall's tau without continuity correction**

Tau -0.09890  
z-value for tau 0.49270  
P-value (1-tailed) 0.31111  
P-value (2-tailed) 0.62222

### **Kendall's tau with continuity correction**

Tau -0.08791  
z-value for tau 0.43796  
P-value (1-tailed) 0.33071  
P-value (2-tailed) 0.66142

### **Egger's regression intercept**

|                            |          |
|----------------------------|----------|
| Intercept                  | 0.71381  |
| Standard error             | 0.56850  |
| 95% lower limit (2-tailed) | -0.52485 |
| 95% upper limit (2-tailed) | 1.95246  |
| t-value                    | 1.25559  |
| df                         | 12.00000 |
| P-value (1-tailed)         | 0.11658  |
| P-value (2-tailed)         | 0.23316  |
